# Supplementary material
Source: MDPI journal article supplement (https://www.mdpi.com/2075-163X/13/4/496)
Supplement: s1 [file s1]

**Table S2.** Major (wt. %) and trace (ppm) element compositions for Late Devonian granitoids of the western part of the Talitsa batholith (Gorny Altai).

| Sample                             | 12-56  | 613   | 614   | 11-39 | 12-53 | 04-28 | 04-28A | 04-27  | 21-45/1 |
|------------------------------------|--------|-------|-------|-------|-------|-------|--------|--------|---------|
| Nº                                 | 1      | 2     | 3     | 4     | 5     | 6     | 7      | 8      | 9       |
| SiO <sub>2</sub>                   | 65,51  | 67,94 | 69,09 | 68,88 | 66,16 | 67,41 | 69,99  | 69,76  | 70,79   |
| TiO <sub>2</sub>                   | 0,53   | 0,72  | 0,66  | 0,68  | 0,61  | 0,56  | 0,53   | 0,53   | 0,46    |
| Al <sub>2</sub> O <sub>3</sub>     | 16,29  | 14,39 | 14,18 | 14,63 | 16,10 | 15,02 | 14,17  | 14,36  | 13,93   |
| Fe <sub>2</sub> O <sub>3</sub> *   | 4,87   | 4,61  | 4,34  | 4,50  | 4,65  | 4,24  | 4,14   | 4,22   | 3,47    |
| MnO                                | 0,12   | 0,08  | 0,08  | 0,09  | 0,100 | 0,09  | 0,09   | 0,09   | 0,09    |
| MgO                                | 1,38   | 1,43  | 1,34  | 1,24  | 1,24  | 1,51  | 1,48   | 1,47   | 0,88    |
| CaO                                | 2,97   | 2,32  | 2,11  | 2,33  | 2,89  | 2,92  | 2,41   | 2,44   | 1,52    |
| Na <sub>2</sub> O                  | 3,26   | 3,09  | 2,90  | 3,43  | 3,16  | 3,07  | 2,64   | 2,59   | 2,87    |
| K <sub>2</sub> O                   | 4,24   | 4,26  | 4,45  | 3,86  | 4,10  | 3,74  | 3,82   | 3,76   | 4,51    |
| P <sub>2</sub> O <sub>5</sub>      | 0,69   | 0,22  | 0,20  | 0,21  | 0,410 | 0,17  | 0,19   | 0,17   | 0,19    |
| LOI                                | 0,36   | 0,65  | 0,47  | 0,07  | 0,28  | 0,92  | 0,51   | 0,66   | 0,94    |
| Total                              | 100,22 | 99,77 | 99,75 | 99,98 | 99,70 | 99,69 | 99,45  | 100,04 | 99,72   |
| K <sub>2</sub> O+Na <sub>2</sub> O | 7,50   | 7,35  | 7,35  | 7,29  | 7,26  | 6,80  | 6,46   | 6,35   | 7,38    |
| K <sub>2</sub> O/Na <sub>2</sub> O | 1,30   | 1,38  | 1,53  | 1,13  | 1,30  | 1,22  | 1,45   | 1,45   | 1,57    |
| A/CNK                              | 1,06   | 1,03  | 1,06  | 1,04  | 1,08  | 1,04  | 1,10   | 1,12   | 1,12    |
| f, %                               | 76     | 74    | 74    | 77    | 77    | 72    | 72     | 72     | 78      |
| Rb                                 | 141    | 146   | 144   | 112   | 111   | 118   | 157    | 146    | 167     |
| Sr                                 | 150    | 140   | 130   | 142   | 184   | 163   | 140    | 154    | 112     |
| Y                                  | 41     | 30    | 33    | 43    | 31    | 25    | 44     | 37     | 31      |
| Zr                                 | 266    | 249   | 255   | 286   | 210   | 204   | 191    | 203    | 208     |
| Nb                                 | 15,1   | 13    | 14    | 15,2  | 11,8  | 10    | 12,3   | 11,3   | 10,6    |
| Cs                                 | 12,6   | 11    | 11    | 10,7  | 6,5   | 7     | 6      | 7      | 12,4    |
| Ba                                 | 427    | 461   | 512   | 462   | 364   | 403   | 357    | 382    | 462     |
| La                                 | 32     | 30    | 32    | 36    | 31    | 30    | 24     | 23     | 35      |
| Ce                                 | 68     | 68    | 69    | 76    | 65    | 64    | 51     | 50     | 71      |
| Pr                                 | 8,1    | 8,05  | 8,00  | 9,28  | 7,32  | 7,54  | 6,44   | 6,37   | 8,62    |
| Nd                                 | 30     | 31    | 32    | 36    | 29    | 29    | 26     | 25     | 32      |
| Sm                                 | 6,8    | 7     | 7     | 7,8   | 6,3   | 6     | 5,9    | 5,2    | 6,7     |
| Eu                                 | 1,29   | 1     | 1     | 1,37  | 1,16  | 1     | 1,00   | 0,98   | 0,98    |
| Gd                                 | 6,5    | 6,9   | 6,7   | 7,5   | 5,3   | 5,8   | 5,8    | 4,9    | 6,8     |
| Tb                                 | 1,10   | 1,2   | 1,1   | 1,41  | 0,94  | 1,0   | 1,10   | 0,92   | 1,00    |
| Dy                                 | 6,4    | 6,4   | 6,9   | 7,8   | 5,3   | 5,4   | 6,9    | 5,6    | 5,8     |
| Ho                                 | 1,34   | 1,3   | 1,4   | 1,49  | 1,03  | 1,1   | 1,36   | 1,08   | 1,12    |
| Er                                 | 3,9    | 3,7   | 3,7   | 4,7   | 2,8   | 2,8   | 3,8    | 3,2    | 3,1     |
| Tm                                 | 0,63   | 0,6   | 0,6   | 0,80  | 0,40  | 0,4   | 0,56   | 0,48   | 0,50    |
| Yb                                 | 4,1    | 3,40  | 3,80  | 5,2   | 2,7   | 2,79  | 3,76   | 3,24   | 3,1     |
| Lu                                 | 0,58   | 0,58  | 0,62  | 0,70  | 0,38  | 0,44  | 0,55   | 0,51   | 0,43    |
| Hf                                 | 6,0    | 6,7   | 6,8   | 9,5   | 5,2   | 5,3   | 5,1    | 5,3    | 5,2     |
| Ta                                 | 1,32   | 1,1   | 1,3   | 1,44  | 0,96  | 0,9   | 1,1    | 1,0    | 0,90    |
| Th                                 | 11,7   | 11,1  | 11,7  | 14,7  | 10,1  | 9,4   | 10,4   | 10,7   | 12,6    |
| U                                  | 2,3    | 2,1   | 2,8   | 3,2   | 1,42  | 1,8   | 3,2    | 2,3    | 1,80    |
| sumRE                              | 172    | 170   | 174   | 196   | 158   | 157   | 139    | 131    | 176,1   |
| (La/Yb) <sub>N</sub>               | 5,4    | 5,9   | 5,6   | 4,7   | 7,7   | 7,2   | 4,4    | 4,9    | 7,5     |
| F, %                               | 0,03   | 0,04  | 0,40  | 0,04  | 0,04  | 0,05  | 0,04   | 0,05   | 0,07    |

| Sample №                           | 21-42/1<br>10 | 21-43/1<br>11 | 21-42/2<br>12 | 21-41/2<br>13 | 11-35<br>14 | 21-44/1<br>15 | 21-46/4<br>16 | 21-44/3<br>17 | 21-20/2<br>18 |
|------------------------------------|---------------|---------------|---------------|---------------|-------------|---------------|---------------|---------------|---------------|
| SiO <sub>2</sub>                   | 71,47         | 72,78         | 73,34         | 74,82         | 74,42       | 74,83         | 75,30         | 75,46         | 74,40         |
| TiO <sub>2</sub>                   | 0,41          | 0,38          | 0,34          | 0,18          | 0,17        | 0,06          | 0,06          | 0,06          | 0,12          |
| Al <sub>2</sub> O <sub>3</sub>     | 13,71         | 13,25         | 12,91         | 12,95         | 13,55       | 13,33         | 13,36         | 13,00         | 13,52         |
| Fe <sub>2</sub> O <sub>3</sub> *   | 3,31          | 3,29          | 2,94          | 1,64          | 1,97        | 1,05          | 1,15          | 0,86          | 1,43          |
| MnO                                | 0,09          | 0,08          | 0,07          | 0,04          | 0,07        | 0,07          | 0,03          | 0,05          | 0,06          |
| MgO                                | 0,92          | 0,86          | 0,82          | 0,40          | 0,35        | 0,09          | 0,13          | 0,16          | 0,26          |
| CaO                                | 1,35          | 1,17          | 1,05          | 0,74          | 0,80        | 0,44          | 0,40          | 0,42          | 0,62          |
| Na <sub>2</sub> O                  | 2,95          | 2,74          | 2,89          | 3,24          | 3,00        | 3,87          | 3,35          | 3,62          | 3,08          |
| K <sub>2</sub> O                   | 4,33          | 4,49          | 4,66          | 5,08          | 4,80        | 4,42          | 5,08          | 4,74          | 5,13          |
| P <sub>2</sub> O <sub>5</sub>      | 0,18          | 0,19          | 0,16          | 0,15          | 0,17        | 0,19          | 0,20          | 0,21          | 0,19          |
| LOI                                | 0,93          | 0,58          | 0,72          | 0,69          | 0,63        | 0,75          | 0,83          | 0,57          | 0,84          |
| Total                              | 99,72         | 99,88         | 99,95         | 99,97         | 99,97       | 99,13         | 99,92         | 99,16         | 99,67         |
| K <sub>2</sub> O+Na <sub>2</sub> O | 7,28          | 7,23          | 7,55          | 8,33          | 7,81        | 8,30          | 8,43          | 8,36          | 8,21          |
| K <sub>2</sub> O/Na <sub>2</sub> O | 1,47          | 1,64          | 1,61          | 1,57          | 1,60        | 1,14          | 1,52          | 1,31          | 1,67          |
| A/CNK                              | 1,14          | 1,15          | 1,10          | 1,06          | 1,17        | 1,11          | 1,14          | 1,10          | 1,15          |
| f, %                               | 76            | 77            | 76            | 79            | 84          | 91            | 89            | 83            | 83            |
| Rb                                 | 165           | 158           | 179           | 188           | 162         | 204           | 137           | 191           | 213           |
| Sr                                 | 106           | 88            | 85            | 47            | 42          | 4,3           | 15,1          | 9,3           | 43            |
| Y                                  | 29            | 30            | 29            | 23            | 19,1        | 8,4           | 11,6          | 11,0          | 18,5          |
| Zr                                 | 181           | 171           | 152           | 111           | 66          | 34            | 27            | 47            | 58            |
| Nb                                 | 10,9          | 9,7           | 8,5           | 7,3           | 7,2         | 5,2           | 7,9           | 4,1           | 8,4           |
| Cs                                 | 19,4          | 12,5          | 20            | 14,2          | 21          | 11,9          | 9,4           | 8,0           | 18,2          |
| Ba                                 | 316           | 298           | 302           | 147           | 144         | 9,9           | 29            | 19,3          | 144           |
| La                                 | 24            | 24            | 19,9          | 11,2          | 10,3        | 2,4           | 3,7           | 1,98          | 8,1           |
| Ce                                 | 49            | 53            | 43            | 24            | 23          | 5,4           | 8,6           | 4,4           | 17,5          |
| Pr                                 | 6,07          | 6,29          | 5,18          | 3,03          | 2,77        | 0,72          | 1,03          | 0,59          | 2,14          |
| Nd                                 | 23            | 24            | 19,4          | 11,3          | 10,7        | 2,5           | 3,7           | 1,96          | 7,6           |
| Sm                                 | 5,1           | 5,4           | 4,8           | 3,1           | 2,7         | 0,89          | 1,25          | 0,75          | 2,00          |
| Eu                                 | 0,87          | 0,71          | 0,74          | 0,33          | 0,50        | 0,039         | 0,083         | 0,041         | 0,24          |
| Gd                                 | 5,3           | 5,4           | 4,9           | 3,4           | 2,9         | 0,89          | 1,27          | 0,99          | 2,1           |
| Tb                                 | 0,91          | 0,90          | 0,82          | 0,63          | 0,64        | 0,21          | 0,30          | 0,24          | 0,45          |
| Dy                                 | 5,5           | 4,9           | 4,9           | 4,0           | 3,7         | 1,43          | 2,0           | 1,76          | 3,0           |
| Ho                                 | 1,04          | 0,96          | 1,04          | 0,79          | 0,71        | 0,26          | 0,40          | 0,33          | 0,64          |
| Er                                 | 2,8           | 2,6           | 2,9           | 2,4           | 2,0         | 0,77          | 1,26          | 1,07          | 1,86          |
| Tm                                 | 0,45          | 0,42          | 0,48          | 0,41          | 0,37        | 0,16          | 0,26          | 0,26          | 0,34          |
| Yb                                 | 2,9           | 2,7           | 3,0           | 2,5           | 2,3         | 1,10          | 1,88          | 1,77          | 2,3           |
| Lu                                 | 0,40          | 0,40          | 0,43          | 0,37          | 0,35        | 0,16          | 0,26          | 0,28          | 0,33          |
| Hf                                 | 4,6           | 4,3           | 4,0           | 3,2           | 2,7         | 1,72          | 1,22          | 2,3           | 1,98          |
| Ta                                 | 1,06          | 1,23          | 1,02          | 1,39          | 1,52        | 0,88          | 1,83          | 1,10          | 2,2           |
| Th                                 | 7,5           | 9,8           | 7,4           | 4,8           | 5,5         | 1,86          | 2,2           | 1,84          | 4,3           |
| U                                  | 1,54          | 1,74          | 1,73          | 1,98          | 4,2         | 2,3           | 7,7           | 4,9           | 1,83          |
| sumRE                              | 127,2         | 131,2         | 111,2         | 67,8          | 63          | 16,9          | 26,0          | 16,4          | 48,5          |
| (La/Yb) <sub>N</sub>               | 5,5           | 6,0           | 4,4           | 3,0           | 3,0         | 1,5           | 1,3           | 0,8           | 2,3           |
| F, %                               | 0,07          | 0,08          | 0,08          | 0,06          | 0,06        | 0,02          | 0,02          | 0,02          | 0,05          |

| Sample | 21-20/1 | 11-37/1 | 21-19/7 | 21-19/4 | 21-16 | 21-19/5 | 21-19/6 | 21-19/2 | 21-15/3 |
|--------|---------|---------|---------|---------|-------|---------|---------|---------|---------|
|--------|---------|---------|---------|---------|-------|---------|---------|---------|---------|

| №                                  | 19    | 20    | 21    | 22    | 23     | 24    | 25    | 26     | 27     |
|------------------------------------|-------|-------|-------|-------|--------|-------|-------|--------|--------|
| SiO <sub>2</sub>                   | 74,52 | 75,07 | 75,47 | 75,06 | 75,62  | 75,69 | 76,19 | 76,60  | 76,69  |
| TiO <sub>2</sub>                   | 0,13  | 0,11  | 0,04  | 0,08  | 0,14   | 0,14  | 0,06  | 0,04   | 0,03   |
| Al <sub>2</sub> O <sub>3</sub>     | 13,42 | 13,86 | 13,34 | 13,37 | 13,11  | 13,13 | 13,09 | 13,01  | 13,56  |
| Fe <sub>2</sub> O <sub>3</sub> *   | 1,42  | 1,32  | 1,01  | 0,96  | 1,86   | 1,71  | 1,05  | 0,94   | 0,90   |
| MnO                                | 0,06  | 0,06  | 0,05  | 0,05  | 0,12   | 0,09  | 0,04  | 0,04   | 0,06   |
| MgO                                | 0,27  | 0,20  | 0,06  | 0,15  | 0,27   | 0,27  | 0,17  | 0,11   | 0,14   |
| CaO                                | 0,64  | 0,54  | 0,40  | 0,43  | 0,50   | 0,57  | 0,71  | 0,51   | 0,59   |
| Na <sub>2</sub> O                  | 3,12  | 3,39  | 3,56  | 3,35  | 3,09   | 3,27  | 3,74  | 3,30   | 4,05   |
| K <sub>2</sub> O                   | 4,89  | 4,85  | 4,57  | 4,90  | 4,32   | 3,70  | 3,93  | 4,66   | 3,13   |
| P <sub>2</sub> O <sub>5</sub>      | 0,18  | 0,20  | 0,20  | 0,16  | 0,18   | 0,18  | 0,15  | 0,15   | 0,16   |
| LOI                                | 0,65  | 0,25  | 0,46  | 0,71  | 0,83   | 1,01  | 0,46  | 0,68   | 0,68   |
| Total                              | 99,32 | 99,87 | 99,17 | 99,24 | 100,07 | 99,80 | 99,59 | 100,06 | 100,00 |
| K <sub>2</sub> O+Na <sub>2</sub> O | 8,01  | 8,24  | 8,13  | 8,25  | 7,41   | 6,97  | 7,66  | 7,96   | 7,18   |
| K <sub>2</sub> O/Na <sub>2</sub> O | 1,57  | 1,43  | 1,28  | 1,47  | 1,40   | 1,13  | 1,05  | 1,41   | 0,77   |
| A/CNK                              | 1,16  | 1,17  | 1,16  | 1,15  | 1,23   | 1,26  | 1,12  | 1,14   | 1,22   |
| f, %                               | 83    | 86    | 93    | 85    | 86     | 85    | 85    | 88     | 86     |
| Rb                                 | 205   | 211   | 223   | 234   | 319    | 190   | 122   | 189    | 151    |
| Sr                                 | 40    | 31    | 3,6   | 5,4   | 24     | 13,4  | 14,4  | 15,3   | 9,6    |
| Y                                  | 19,6  | 13,2  | 6,5   | 10,3  | 15,4   | 9,2   | 7,2   | 10,3   | 16,3   |
| Zr                                 | 62    | 54    | 25    | 36    | 56     | 25    | 12,1  | 25     | 43     |
| Nb                                 | 7,9   | 8,7   | 7,1   | 5,9   | 11,5   | 4,0   | 4,1   | 4,6    | 2,2    |
| Cs                                 | 16,5  | 25    | 14,1  | 21    | 39     | 12,4  | 7,8   | 12,4   | 12,6   |
| Ba                                 | 134   | 153   | 4,0   | 13,5  | 70     | 26    | 33    | 28     | 12,7   |
| La                                 | 7,9   | 6,1   | 1,90  | 3,0   | 6,5    | 2,5   | 3,1   | 3,1    | 3,9    |
| Ce                                 | 16,5  | 14,2  | 4,5   | 7,6   | 15,6   | 5,9   | 6,5   | 7,3    | 10,2   |
| Pr                                 | 1,95  | 1,72  | 0,59  | 0,97  | 1,79   | 0,77  | 0,78  | 0,94   | 1,24   |
| Nd                                 | 7,2   | 6,8   | 2,0   | 3,3   | 6,8    | 2,7   | 2,6   | 3,4    | 4,2    |
| Sm                                 | 2,2   | 1,71  | 0,83  | 1,30  | 2,0    | 0,84  | 0,79  | 1,16   | 1,42   |
| Eu                                 | 0,24  | 0,37  | 0,030 | 0,041 | 0,20   | 0,078 | 0,083 | 0,080  | 0,083  |
| Gd                                 | 2,1   | 2,1   | 0,78  | 1,21  | 2,1    | 0,91  | 0,85  | 1,08   | 1,53   |
| Tb                                 | 0,43  | 0,44  | 0,19  | 0,27  | 0,41   | 0,21  | 0,21  | 0,25   | 0,39   |
| Dy                                 | 3,1   | 2,8   | 1,26  | 1,93  | 2,6    | 1,44  | 1,30  | 1,64   | 2,6    |
| Ho                                 | 0,64  | 0,49  | 0,24  | 0,35  | 0,54   | 0,30  | 0,24  | 0,32   | 0,51   |
| Er                                 | 2,0   | 1,44  | 0,69  | 1,00  | 1,41   | 0,91  | 0,64  | 0,95   | 1,49   |
| Tm                                 | 0,34  | 0,27  | 0,15  | 0,23  | 0,23   | 0,15  | 0,13  | 0,15   | 0,27   |
| Yb                                 | 2,4   | 1,80  | 1,06  | 1,60  | 1,60   | 1,04  | 0,84  | 1,00   | 1,80   |
| Lu                                 | 0,34  | 0,25  | 0,16  | 0,22  | 0,24   | 0,15  | 0,12  | 0,16   | 0,28   |
| Hf                                 | 1,98  | 2,8   | 1,52  | 1,70  | 1,77   | 1,07  | 0,54  | 1,12   | 1,88   |
| Ta                                 | 1,91  | 1,96  | 2,5   | 1,32  | 2,2    | 1,08  | 1,51  | 1,16   | 0,60   |
| Th                                 | 3,9   | 4,1   | 3,0   | 2,5   | 4,2    | 2,3   | 1,46  | 2,6    | 2,9    |
| U                                  | 1,83  | 3,1   | 1,18  | 2,3   | 2,1    | 2,1   | 0,96  | 2,2    | 2,4    |
| ΣREE                               | 47,4  | 40    | 14,4  | 22,9  | 42,1   | 17,9  | 18,2  | 21,6   | 29,9   |
| (La/Yb) <sub>N</sub>               | 2,2   | 2,3   | 1,2   | 1,2   | 2,8    | 1,6   | 2,5   | 2,1    | 1,5    |
| F, %                               | 0,05  | 0,04  | 0,04  | 0,03  | 0,07   | 0,04  | 0,02  | 0,03   | 0,03   |

Notes: 1–4 – melanocratic granites of the Charysh intrusion, 5–8 – melanocratic granites of the Borovlyanka intrusion, 9–27 – rocks of the Aba massif: 9–14 – biotite granites and leucogranites of the main phase, 15–17 – muscovite aplites (dykes), 18–27 – two-mica and muscovite leucogranites of the late phase.

Fe<sub>2</sub>O<sub>3</sub>\* – total Fe as Fe<sub>2</sub>O<sub>3</sub>.

A/CNK = Al<sub>2</sub>O<sub>3</sub>/(CaO+Na<sub>2</sub>O+K<sub>2</sub>O), molecular quantities.

f = 0.9\*Fe<sub>2</sub>O<sub>3</sub>/(MgO+0.9\*Fe<sub>2</sub>O<sub>3</sub>).
