# Supplementary material
Source: MDPI journal article supplement (https://www.mdpi.com/2075-163X/13/4/496)
Supplement: s1 [file s1]

**Table S1.** Zircon U-Th-Pb isotopic data & calculated ages for Late Devonian granitoids of Western part of the Talitsa batholith.

**12-056, biotite melanogranite of Carysh intrusion**

| №  | Th/U        | U<br>ppm   | <sup>206</sup> Pb<br>ppm | Isotopic ratios                      |                |                                     |                |                                     |               |             |                                      |               | ages                                 |           |                                     |            |                                     |             |                                      |             | D,<br>%     |
|----|-------------|------------|--------------------------|--------------------------------------|----------------|-------------------------------------|----------------|-------------------------------------|---------------|-------------|--------------------------------------|---------------|--------------------------------------|-----------|-------------------------------------|------------|-------------------------------------|-------------|--------------------------------------|-------------|-------------|
|    |             |            |                          | <sup>207</sup> Pb/ <sup>206</sup> Pb | 1σ             | <sup>207</sup> Pb/ <sup>235</sup> U | 1σ             | <sup>206</sup> Pb/ <sup>238</sup> U | 1σ            | Rho         | <sup>208</sup> Pb/ <sup>232</sup> Th | 1σ            | <sup>207</sup> Pb/ <sup>206</sup> Pb | 1σ        | <sup>207</sup> Pb/ <sup>235</sup> U | 1σ         | <sup>206</sup> Pb/ <sup>238</sup> U | 1σ          | <sup>208</sup> Pb/ <sup>232</sup> Th | 1σ          |             |
| 1  | 0,20        | 300        | 18,3                     | 0,05473                              | 0,00108        | 0,45924                             | 0,0074         | 0,06095                             | 0,00087       | 0,886       | 0,01858                              | 0,00031       | 401,2                                | 43,3      | 383,7                               | 5,15       | 381,4                               | 5,31        | 372,1                                | 6,16        | 0,6         |
| 2  | 0,10        | 565        | 34,4                     | 0,05454                              | 0,00104        | 0,45632                             | 0,00703        | 0,06077                             | 0,00087       | 0,929       | 0,01908                              | 0,00032       | 393,4                                | 42,1      | 381,7                               | 4,9        | 380,3                               | 5,27        | 382,1                                | 6,33        | 0,4         |
| 3  | 0,14        | 1197       | 72,3                     | 0,05438                              | 0,00102        | 0,45214                             | 0,00677        | 0,06039                             | 0,00086       | 0,951       | 0,01803                              | 0,00027       | 386,7                                | 41,4      | 378,8                               | 4,74       | 378                                 | 5,23        | 361,3                                | 5,29        | 0,2         |
| 4  | 0,37        | 317        | 19,2                     | 0,05516                              | 0,00111        | 0,4599                              | 0,00762        | 0,06056                             | 0,00087       | 0,867       | 0,01806                              | 0,00029       | 418,4                                | 43,7      | 384,2                               | 5,3        | 379                                 | 5,3         | 361,7                                | 5,67        | 1,4         |
| 5  | 0,38        | 390        | 23,5                     | 0,05515                              | 0,00107        | 0,45797                             | 0,00725        | 0,06031                             | 0,00086       | 0,901       | 0,01876                              | 0,00028       | 418,2                                | 42,3      | 382,8                               | 5,05       | 377,5                               | 5,25        | 375,6                                | 5,54        | 1,4         |
| 6  | 0,22        | 327        | 19,9                     | 0,0551                               | 0,00108        | 0,46238                             | 0,0074         | 0,06094                             | 0,00088       | 0,902       | 0,01864                              | 0,0003        | 416,4                                | 42,5      | 385,9                               | 5,14       | 381,4                               | 5,33        | 373,4                                | 5,98        | 1,2         |
| 7  | 0,08        | 934        | 56,7                     | 0,05412                              | 0,00102        | 0,45192                             | 0,00689        | 0,06065                             | 0,00087       | 0,941       | 0,01767                              | 0,0003        | 376                                  | 42        | 378,6                               | 4,82       | 379,6                               | 5,28        | 354                                  | 5,87        | -0,3        |
| 8  | 0,24        | 320        | 19,6                     | 0,05405                              | 0,00108        | 0,45489                             | 0,00752        | 0,06113                             | 0,00088       | 0,871       | 0,02009                              | 0,00034       | 372,8                                | 44,5      | 380,7                               | 5,25       | 382,5                               | 5,37        | 402                                  | 6,64        | -0,5        |
| 9  | <b>0,46</b> | <b>141</b> | <b>10,7</b>              | <b>0,05728</b>                       | <b>0,00118</b> | <b>0,60195</b>                      | <b>0,01037</b> | <b>0,07632</b>                      | <b>0,0011</b> | <b>0,84</b> | <b>0,02248</b>                       | <b>0,0004</b> | <b>501,9</b>                         | <b>45</b> | <b>478,5</b>                        | <b>6,6</b> | <b>474,1</b>                        | <b>6,66</b> | <b>449,4</b>                         | <b>7,32</b> | <b>0,9</b>  |
| 10 | <b>0,38</b> | <b>111</b> | <b>7,0</b>               | <b>0,05452</b>                       | <b>0,00118</b> | <b>0,47255</b>                      | <b>0,00867</b> | <b>0,06295</b>                      | <b>0,0009</b> | <b>0,8</b>  | <b>0,0183</b>                        | <b>0,0003</b> | <b>392,5</b>                         | <b>48</b> | <b>392,9</b>                        | <b>6</b>   | <b>393,6</b>                        | <b>5,61</b> | <b>366,6</b>                         | <b>6,57</b> | <b>-0,2</b> |
| 11 | 0,20        | 677        | 41,1                     | 0,05483                              | 0,00106        | 0,45882                             | 0,00721        | 0,06077                             | 0,00088       | 0,922       | 0,01704                              | 0,00028       | 405,4                                | 42,2      | 383,4                               | 5,02       | 380,3                               | 5,33        | 341,5                                | 5,48        | 0,8         |
| 12 | 0,12        | 791        | 48,0                     | 0,0546                               | 0,00105        | 0,45616                             | 0,00713        | 0,06067                             | 0,00088       | 0,928       | 0,01904                              | 0,00032       | 396,1                                | 42,1      | 381,6                               | 4,97       | 379,7                               | 5,32        | 381,2                                | 6,29        | 0,5         |
| 13 | 0,18        | 634        | 38,7                     | 0,05406                              | 0,00104        | 0,45391                             | 0,00712        | 0,06098                             | 0,00088       | 0,92        | 0,01974                              | 0,00032       | 373,4                                | 42,7      | 380                                 | 4,98       | 381,6                               | 5,35        | 395                                  | 6,3         | -0,4        |
| 14 | <b>0,41</b> | <b>515</b> | <b>43,8</b>              | <b>0,06044</b>                       | <b>0,00117</b> | <b>0,70714</b>                      | <b>0,01121</b> | <b>0,08497</b>                      | <b>0,0012</b> | <b>0,91</b> | <b>0,02923</b>                       | <b>0,0005</b> | <b>619,5</b>                         | <b>41</b> | <b>543</b>                          | <b>6,7</b> | <b>525,7</b>                        | <b>7,31</b> | <b>582,3</b>                         | <b>8,91</b> | <b>3,3</b>  |
| 15 | <b>0,34</b> | <b>368</b> | <b>25,1</b>              | <b>0,05513</b>                       | <b>0,00108</b> | <b>0,51816</b>                      | <b>0,00834</b> | <b>0,06826</b>                      | <b>0,001</b>  | <b>0,9</b>  | <b>0,01919</b>                       | <b>0,0003</b> | <b>417,3</b>                         | <b>42</b> | <b>423,9</b>                        | <b>5,6</b> | <b>425,7</b>                        | <b>5,97</b> | <b>384,3</b>                         | <b>6,14</b> | <b>-0,4</b> |
| 16 | 0,51        | 696        | 42,0                     | 0,05466                              | 0,00105        | 0,45452                             | 0,00715        | 0,0604                              | 0,00087       | 0,916       | 0,01833                              | 0,00028       | 398,3                                | 42,2      | 380,4                               | 4,99       | 378                                 | 5,31        | 367,2                                | 5,64        | 0,6         |
| 17 | 0,12        | 1028       | 62,3                     | 0,05494                              | 0,00105        | 0,45803                             | 0,00717        | 0,06055                             | 0,00088       | 0,928       | 0,01743                              | 0,00029       | 409,6                                | 41,9      | 382,9                               | 4,99       | 379                                 | 5,33        | 349,3                                | 5,84        | 1,0         |
| 18 | 0,75        | 846        | 51,3                     | 0,05625                              | 0,00106        | 0,4696                              | 0,00714        | 0,06064                             | 0,00087       | 0,944       | 0,01713                              | 0,00024       | 461,3                                | 41,6      | 390,9                               | 4,93       | 379,5                               | 5,27        | 343,3                                | 4,77        | 3,0         |
| 19 | 0,14        | 749        | 45,3                     | 0,05675                              | 0,00109        | 0,47271                             | 0,00733        | 0,0605                              | 0,00087       | 0,927       | 0,0145                               | 0,00024       | 481                                  | 42,2      | 393,1                               | 5,05       | 378,7                               | 5,28        | 291                                  | 4,82        | 3,8         |
| 20 | 0,19        | 569        | 34,7                     | 0,05702                              | 0,00109        | 0,47817                             | 0,00737        | 0,06091                             | 0,00087       | 0,927       | 0,01925                              | 0,0003        | 491,8                                | 41,6      | 396,8                               | 5,06       | 381,1                               | 5,31        | 385,5                                | 5,86        | 4,1         |
| 21 | 0,32        | 333        | 20,5                     | 0,0571                               | 0,00115        | 0,48472                             | 0,00811        | 0,06166                             | 0,0009        | 0,872       | 0,01518                              | 0,00026       | 494,7                                | 43,7      | 401,3                               | 5,55       | 385,7                               | 5,45        | 304,5                                | 5,26        | 4,0         |
| 22 | 0,27        | 737        | 46,4                     | 0,05429                              | 0,00104        | 0,47033                             | 0,0074         | 0,06293                             | 0,00091       | 0,919       | 0,02067                              | 0,00033       | 382,8                                | 42,6      | 391,4                               | 5,11       | 393,4                               | 5,52        | 413,6                                | 6,47        | -0,5        |

|    |      |      |      |         |         |         |         |         |         |       |         |         |       |      |       |      |       |      |     |      |     |
|----|------|------|------|---------|---------|---------|---------|---------|---------|-------|---------|---------|-------|------|-------|------|-------|------|-----|------|-----|
| 23 | 0,12 | 1020 | 61,9 | 0,05584 | 0,00107 | 0,46646 | 0,00728 | 0,06067 | 0,00088 | 0,929 | 0,01979 | 0,00033 | 445,6 | 41,6 | 388,7 | 5,04 | 379,7 | 5,34 | 396 | 6,53 | 2,4 |
|----|------|------|------|---------|---------|---------|---------|---------|---------|-------|---------|---------|-------|------|-------|------|-------|------|-----|------|-----|

12-053, biotite melanogranite of Borovlyanka intrusion

| №  | Th/U | U<br>ppm | <sup>206</sup> Pb<br>ppm | Isotopic ratios                      |        |                                     |        |                                     |        |      |                                      |        | ages                                 |    |                                     |     |                                     |     |                                      |      |      |  | D,<br>% |
|----|------|----------|--------------------------|--------------------------------------|--------|-------------------------------------|--------|-------------------------------------|--------|------|--------------------------------------|--------|--------------------------------------|----|-------------------------------------|-----|-------------------------------------|-----|--------------------------------------|------|------|--|---------|
|    |      |          |                          | <sup>207</sup> Pb/ <sup>206</sup> Pb | 1σ     | <sup>207</sup> Pb/ <sup>235</sup> U | 1σ     | <sup>206</sup> Pb/ <sup>238</sup> U | 1σ     | Rho  | <sup>208</sup> Pb/ <sup>232</sup> Th | 1σ     | <sup>207</sup> Pb/ <sup>206</sup> Pb | 1σ | <sup>207</sup> Pb/ <sup>235</sup> U | 1σ  | <sup>206</sup> Pb/ <sup>238</sup> U | 1σ  | <sup>208</sup> Pb/ <sup>232</sup> Th | 1σ   |      |  |         |
| 1  | 0,16 | 835      | 51                       | 0,0539                               | 0,0011 | 0,4505                              | 0,0072 | 0,0607                              | 0,0009 | 0,90 | 0,0177                               | 0,0003 | 368                                  | 44 | 377,7                               | 5,0 | 379,8                               | 5,3 | 353,9                                | 6,2  | -0,6 |  |         |
| 2  | 0,27 | 545      | 33                       | 0,0540                               | 0,0011 | 0,4511                              | 0,0074 | 0,0607                              | 0,0009 | 0,88 | 0,0174                               | 0,0003 | 371                                  | 44 | 378,0                               | 5,1 | 379,8                               | 5,3 | 349,0                                | 5,9  | -0,5 |  |         |
| 3  | 0,15 | 634      | 38                       | 0,0540                               | 0,0011 | 0,4471                              | 0,0072 | 0,0602                              | 0,0009 | 0,89 | 0,0173                               | 0,0003 | 370                                  | 44 | 375,2                               | 5,1 | 376,7                               | 5,2 | 346,6                                | 6,3  | -0,4 |  |         |
| 4  | 0,07 | 831      | 50                       | 0,0539                               | 0,0010 | 0,4496                              | 0,0070 | 0,0606                              | 0,0009 | 0,91 | 0,0177                               | 0,0004 | 365                                  | 43 | 377,0                               | 4,9 | 379,5                               | 5,3 | 355,5                                | 6,9  | -0,7 |  |         |
| 5  | 0,20 | 1383     | 84                       | 0,0542                               | 0,0010 | 0,4555                              | 0,0071 | 0,0611                              | 0,0009 | 0,92 | 0,0182                               | 0,0003 | 379                                  | 43 | 381,2                               | 4,9 | 382,1                               | 5,3 | 364,0                                | 5,9  | -0,2 |  |         |
| 6  | 0,26 | 882      | 54                       | 0,0541                               | 0,0011 | 0,4557                              | 0,0072 | 0,0611                              | 0,0009 | 0,90 | 0,0187                               | 0,0003 | 377                                  | 43 | 381,3                               | 5,0 | 382,6                               | 5,3 | 374,8                                | 6,0  | -0,3 |  |         |
| 7  | 0,13 | 1869     | 112                      | 0,0542                               | 0,0010 | 0,4486                              | 0,0069 | 0,0602                              | 0,0009 | 0,93 | 0,0181                               | 0,0003 | 378                                  | 42 | 376,3                               | 4,8 | 376,6                               | 5,2 | 362,4                                | 5,9  | -0,1 |  |         |
| 8  | 0,20 | 837      | 51                       | 0,0543                               | 0,0011 | 0,4587                              | 0,0072 | 0,0613                              | 0,0009 | 0,91 | 0,0186                               | 0,0003 | 385                                  | 43 | 383,4                               | 5,0 | 383,7                               | 5,3 | 372,3                                | 6,1  | -0,1 |  |         |
| 9  | 0,13 | 265      | 16                       | 0,0535                               | 0,0012 | 0,4514                              | 0,0082 | 0,0613                              | 0,0009 | 0,80 | 0,0187                               | 0,0005 | 350                                  | 48 | 378,3                               | 5,8 | 383,5                               | 5,4 | 374,4                                | 8,9  | -1,4 |  |         |
| 10 | 0,39 | 406      | 25                       | 0,0548                               | 0,0011 | 0,4602                              | 0,0077 | 0,0610                              | 0,0009 | 0,87 | 0,0174                               | 0,0003 | 406                                  | 44 | 384,4                               | 5,3 | 381,5                               | 5,3 | 349,4                                | 5,8  | 0,8  |  |         |
| 11 | 0,23 | 139      | 8,5                      | 0,0551                               | 0,0013 | 0,4610                              | 0,0090 | 0,0608                              | 0,0009 | 0,75 | 0,0178                               | 0,0004 | 414                                  | 49 | 384,9                               | 6,2 | 380,6                               | 5,4 | 356,2                                | 8,0  | 1,1  |  |         |
| 12 | 0,58 | 751      | 46                       | 0,0544                               | 0,0011 | 0,4557                              | 0,0072 | 0,0608                              | 0,0009 | 0,91 | 0,0182                               | 0,0003 | 389                                  | 43 | 381,2                               | 5,0 | 380,6                               | 5,3 | 363,7                                | 5,6  | 0,2  |  |         |
| 13 | 0,06 | 354      | 22                       | 0,0540                               | 0,0011 | 0,4530                              | 0,0078 | 0,0610                              | 0,0009 | 0,84 | 0,0189                               | 0,0005 | 369                                  | 46 | 379,4                               | 5,4 | 381,6                               | 5,3 | 378,7                                | 10,1 | -0,6 |  |         |
| 14 | 0,10 | 676      | 41                       | 0,0539                               | 0,0011 | 0,4536                              | 0,0073 | 0,0612                              | 0,0009 | 0,89 | 0,0187                               | 0,0004 | 365                                  | 44 | 379,8                               | 5,1 | 382,8                               | 5,3 | 374,5                                | 7,2  | -0,8 |  |         |
| 15 | 0,18 | 711      | 43                       | 0,0548                               | 0,0011 | 0,4579                              | 0,0072 | 0,0607                              | 0,0009 | 0,91 | 0,0179                               | 0,0003 | 404                                  | 43 | 382,8                               | 5,1 | 379,9                               | 5,3 | 358,1                                | 6,0  | 0,8  |  |         |
| 16 | 0,20 | 899      | 55                       | 0,0544                               | 0,0011 | 0,4561                              | 0,0071 | 0,0609                              | 0,0009 | 0,91 | 0,0184                               | 0,0003 | 387                                  | 43 | 381,5                               | 5,0 | 381,2                               | 5,3 | 367,8                                | 5,9  | 0,1  |  |         |
| 17 | 0,31 | 885      | 54                       | 0,0546                               | 0,0011 | 0,4587                              | 0,0072 | 0,0610                              | 0,0009 | 0,91 | 0,0188                               | 0,0003 | 398                                  | 43 | 383,4                               | 5,0 | 381,6                               | 5,3 | 376,0                                | 5,9  | 0,5  |  |         |
| 18 | 0,06 | 239      | 15                       | 0,0540                               | 0,0011 | 0,4524                              | 0,0080 | 0,0609                              | 0,0009 | 0,82 | 0,0188                               | 0,0006 | 370                                  | 47 | 378,9                               | 5,6 | 380,9                               | 5,4 | 376,8                                | 11,0 | -0,5 |  |         |
| 19 | 0,25 | 320      | 20                       | 0,0538                               | 0,0011 | 0,4523                              | 0,0078 | 0,0611                              | 0,0009 | 0,83 | 0,0181                               | 0,0003 | 361                                  | 46 | 378,9                               | 5,5 | 382,3                               | 5,4 | 363,3                                | 6,7  | -0,9 |  |         |
| 20 | 0,15 | 607      | 37                       | 0,0550                               | 0,0011 | 0,4600                              | 0,0074 | 0,0608                              | 0,0009 | 0,89 | 0,0178                               | 0,0003 | 411                                  | 43 | 384,3                               | 5,2 | 380,3                               | 5,3 | 356,9                                | 6,4  | 1,1  |  |         |
| 21 | 0,17 | 919      | 56                       | 0,0538                               | 0,0010 | 0,4511                              | 0,0070 | 0,0610                              | 0,0009 | 0,91 | 0,0181                               | 0,0003 | 360                                  | 43 | 378,0                               | 4,9 | 381,5                               | 5,3 | 362,9                                | 6,0  | -0,9 |  |         |
| 22 | 0,17 | 568      | 35                       | 0,0539                               | 0,0011 | 0,4543                              | 0,0076 | 0,0613                              | 0,0009 | 0,86 | 0,0183                               | 0,0004 | 365                                  | 45 | 380,3                               | 5,3 | 383,3                               | 5,4 | 367,0                                | 6,9  | -0,8 |  |         |
| 23 | 0,04 | 2014     | 122                      | 0,0544                               | 0,0010 | 0,4551                              | 0,0070 | 0,0608                              | 0,0009 | 0,94 | 0,0175                               | 0,0003 | 387                                  | 42 | 380,8                               | 4,9 | 380,4                               | 5,3 | 350,6                                | 6,2  | 0,1  |  |         |

|    |             |            |           |               |               |               |               |               |               |             |               |               |            |           |              |            |              |            |              |            |             |
|----|-------------|------------|-----------|---------------|---------------|---------------|---------------|---------------|---------------|-------------|---------------|---------------|------------|-----------|--------------|------------|--------------|------------|--------------|------------|-------------|
| 24 | 0,13        | 1228       | 75        | 0,0537        | 0,0010        | 0,4508        | 0,0070        | 0,0610        | 0,0009        | 0,92        | 0,0180        | 0,0003        | 357        | 43        | 377,8        | 4,9        | 381,7        | 5,3        | 361,3        | 6,0        | -1,0        |
| 25 | 0,08        | 330        | 20        | 0,0544        | 0,0011        | 0,4571        | 0,0078        | 0,0611        | 0,0009        | 0,85        | 0,0184        | 0,0004        | 386        | 45        | 382,2        | 5,4        | 382,1        | 5,4        | 368,0        | 8,4        | 0,0         |
| 26 | 0,10        | 496        | 30        | 0,0547        | 0,0011        | 0,4567        | 0,0076        | 0,0606        | 0,0009        | 0,86        | 0,0183        | 0,0004        | 400        | 44        | 382,0        | 5,3        | 379,5        | 5,3        | 366,3        | 7,7        | 0,7         |
| 27 | 0,34        | 260        | 16        | 0,0553        | 0,0011        | 0,4614        | 0,0079        | 0,0607        | 0,0009        | 0,84        | 0,0178        | 0,0003        | 423        | 45        | 385,2        | 5,5        | 379,6        | 5,3        | 355,7        | 6,3        | 1,5         |
| 28 | 0,18        | 502        | 31        | 0,0541        | 0,0011        | 0,4548        | 0,0074        | 0,0611        | 0,0009        | 0,89        | 0,0178        | 0,0003        | 375        | 44        | 380,6        | 5,1        | 382,2        | 5,3        | 356,3        | 6,3        | -0,4        |
| 29 | 0,06        | 614        | 37        | 0,0545        | 0,0011        | 0,4520        | 0,0074        | 0,0602        | 0,0009        | 0,89        | 0,0177        | 0,0004        | 391        | 44        | 378,7        | 5,2        | 377,1        | 5,3        | 354,4        | 7,8        | 0,4         |
| 30 | 0,22        | 677        | 41        | 0,0544        | 0,0011        | 0,4564        | 0,0073        | 0,0610        | 0,0009        | 0,90        | 0,0183        | 0,0003        | 386        | 43        | 381,8        | 5,1        | 381,7        | 5,3        | 367,3        | 6,2        | 0,0         |
| 31 | 0,08        | 681        | 41        | 0,0549        | 0,0011        | 0,4592        | 0,0074        | 0,0607        | 0,0009        | 0,89        | 0,0207        | 0,0004        | 409        | 43        | 383,7        | 5,1        | 380,0        | 5,3        | 414,7        | 7,9        | 1,0         |
| 32 | 0,10        | 954        | 57        | 0,0535        | 0,0010        | 0,4408        | 0,0070        | 0,0598        | 0,0009        | 0,90        | 0,0183        | 0,0003        | 350        | 44        | 370,8        | 5,0        | 374,7        | 5,2        | 366,9        | 6,5        | -1,0        |
| 33 | 0,22        | 603        | 36        | 0,0541        | 0,0011        | 0,4476        | 0,0075        | 0,0602        | 0,0009        | 0,87        | 0,0164        | 0,0003        | 373        | 45        | 375,6        | 5,3        | 376,5        | 5,3        | 329,2        | 6,0        | -0,2        |
| 34 | <b>0,28</b> | <b>164</b> | <b>10</b> | <b>0,0537</b> | <b>0,0012</b> | <b>0,4674</b> | <b>0,0089</b> | <b>0,0633</b> | <b>0,0009</b> | <b>0,77</b> | <b>0,0197</b> | <b>0,0004</b> | <b>357</b> | <b>50</b> | <b>389,4</b> | <b>6,1</b> | <b>395,4</b> | <b>5,6</b> | <b>395,1</b> | <b>8,1</b> | <b>-1,5</b> |
| 35 | 0,15        | 1295       | 79        | 0,0542        | 0,0011        | 0,4525        | 0,0072        | 0,0606        | 0,0009        | 0,91        | 0,0184        | 0,0003        | 379        | 43        | 379,0        | 5,0        | 379,5        | 5,3        | 367,8        | 6,3        | -0,1        |
| 36 | 0,15        | 694        | 41        | 0,0542        | 0,0011        | 0,4439        | 0,0072        | 0,0595        | 0,0009        | 0,90        | 0,0180        | 0,0003        | 379        | 44        | 373,0        | 5,0        | 372,4        | 5,2        | 360,0        | 6,4        | 0,2         |

21-43/1, biotite granite of Aba massif, main phase

| №  | Th/U | U<br>ppm | <sup>206</sup> Pb<br>ppm | Isotopic ratios                      |        |                                     |        |                                     |        |      |                                      |        | Ages                                 |    |                                     |     |                                     |     |                                      |     |      | D,<br>% |
|----|------|----------|--------------------------|--------------------------------------|--------|-------------------------------------|--------|-------------------------------------|--------|------|--------------------------------------|--------|--------------------------------------|----|-------------------------------------|-----|-------------------------------------|-----|--------------------------------------|-----|------|---------|
|    |      |          |                          | <sup>207</sup> Pb/ <sup>206</sup> Pb | 1σ     | <sup>207</sup> Pb/ <sup>235</sup> U | 1σ     | <sup>206</sup> Pb/ <sup>238</sup> U | 1σ     | Rho  | <sup>208</sup> Pb/ <sup>232</sup> Th | 1σ     | <sup>207</sup> Pb/ <sup>206</sup> Pb | 1σ | <sup>207</sup> Pb/ <sup>235</sup> U | 1σ  | <sup>206</sup> Pb/ <sup>238</sup> U | 1σ  | <sup>208</sup> Pb/ <sup>232</sup> Th | 1σ  |      |         |
| 1  | 0,09 | 472      | 29                       | 0,0532                               | 0,0010 | 0,4501                              | 0,0072 | 0,0614                              | 0,0009 | 0,89 | 0,0187                               | 0,0004 | 338                                  | 44 | 377,3                               | 5,1 | 384,3                               | 5,4 | 373,6                                | 7,5 | -1,8 |         |
| 2  | 0,32 | 336      | 21                       | 0,0543                               | 0,0011 | 0,4594                              | 0,0073 | 0,0615                              | 0,0009 | 0,91 | 0,0199                               | 0,0003 | 381                                  | 43 | 383,9                               | 5,1 | 384,8                               | 5,4 | 397,3                                | 6,2 | -0,2 |         |
| 3  | 0,22 | 199      | 12                       | 0,0542                               | 0,0012 | 0,4578                              | 0,0082 | 0,0614                              | 0,0009 | 0,81 | 0,0199                               | 0,0004 | 379                                  | 47 | 382,7                               | 5,7 | 383,8                               | 5,4 | 398,8                                | 7,7 | -0,3 |         |
| 4  | 0,07 | 432      | 26                       | 0,0542                               | 0,0010 | 0,4568                              | 0,0071 | 0,0612                              | 0,0009 | 0,92 | 0,0196                               | 0,0004 | 381                                  | 43 | 382,0                               | 5,0 | 382,7                               | 5,3 | 392,4                                | 7,6 | -0,2 |         |
| 5  | 0,27 | 237      | 14                       | 0,0547                               | 0,0011 | 0,4562                              | 0,0075 | 0,0606                              | 0,0009 | 0,88 | 0,0186                               | 0,0003 | 400                                  | 43 | 381,6                               | 5,2 | 379,2                               | 5,3 | 371,5                                | 6,2 | 0,6  |         |
| 6  | 0,52 | 285      | 17                       | 0,0542                               | 0,0011 | 0,4575                              | 0,0073 | 0,0613                              | 0,0009 | 0,90 | 0,0194                               | 0,0003 | 381                                  | 43 | 382,5                               | 5,1 | 383,3                               | 5,4 | 388,9                                | 5,8 | -0,2 |         |
| 7  | 0,33 | 139      | 8,5                      | 0,0551                               | 0,0012 | 0,4642                              | 0,0084 | 0,0612                              | 0,0009 | 0,80 | 0,0187                               | 0,0003 | 417                                  | 47 | 387,2                               | 5,9 | 382,7                               | 5,4 | 373,9                                | 6,8 | 1,2  |         |
| 8  | 0,20 | 99       | 6,1                      | 0,0543                               | 0,0013 | 0,4578                              | 0,0091 | 0,0613                              | 0,0009 | 0,74 | 0,0180                               | 0,0004 | 382                                  | 51 | 382,7                               | 6,4 | 383,4                               | 5,5 | 361,3                                | 8,7 | -0,2 |         |
| 9  | 0,49 | 472      | 30                       | 0,0554                               | 0,0011 | 0,4795                              | 0,0074 | 0,0628                              | 0,0009 | 0,92 | 0,0195                               | 0,0003 | 429                                  | 42 | 397,7                               | 5,1 | 392,8                               | 5,3 | 390,9                                | 5,7 | 1,2  |         |
| 10 |      |          | 31                       | 0,0551                               | 0,0011 | 0,4610                              | 0,0072 | 0,0607                              | 0,0009 | 0,92 | 0,0232                               | 0,0005 | 418                                  | 42 | 384,9                               | 5,0 | 380,0                               | 5,3 | 463,4                                | 8,9 | 1,3  |         |
| 11 | 0,14 | 211      | 13                       | 0,0550                               | 0,0012 | 0,4645                              | 0,0082 | 0,0613                              | 0,0009 | 0,83 | 0,0196                               | 0,0004 | 414                                  | 45 | 387,4                               | 5,7 | 383,5                               | 5,4 | 391,8                                | 8,5 | 1,0  |         |

|           |             |            |           |               |               |               |               |               |               |             |               |               |            |           |              |            |              |            |              |            |            |
|-----------|-------------|------------|-----------|---------------|---------------|---------------|---------------|---------------|---------------|-------------|---------------|---------------|------------|-----------|--------------|------------|--------------|------------|--------------|------------|------------|
| 12        | 0,08        | 248        | 15        | 0,0555        | 0,0011        | 0,4688        | 0,0080        | 0,0614        | 0,0009        | 0,85        | 0,0197        | 0,0005        | 430        | 45        | 390,3        | 5,5        | 384,2        | 5,4        | 395,0        | 9,7        | 1,6        |
| 13        | 0,16        | 276        | 17        | 0,0542        | 0,0011        | 0,4493        | 0,0073        | 0,0603        | 0,0009        | 0,88        | 0,0181        | 0,0003        | 377        | 44        | 376,8        | 5,1        | 377,3        | 5,3        | 361,5        | 6,6        | -0,1       |
| <b>14</b> | <b>0,29</b> | <b>183</b> | <b>12</b> | <b>0,0550</b> | <b>0,0011</b> | <b>0,4794</b> | <b>0,0082</b> | <b>0,0634</b> | <b>0,0009</b> | <b>0,85</b> | <b>0,0188</b> | <b>0,0003</b> | <b>410</b> | <b>45</b> | <b>397,7</b> | <b>5,6</b> | <b>396,0</b> | <b>5,6</b> | <b>376,4</b> | <b>6,6</b> | <b>0,4</b> |
| 15        | 0,08        | 343        | 21        | 0,0539        | 0,0011        | 0,4454        | 0,0074        | 0,0600        | 0,0009        | 0,88        | 0,0189        | 0,0004        | 368        | 45        | 374,1        | 5,2        | 375,6        | 5,3        | 378,5        | 8,3        | -0,4       |
| <b>16</b> | <b>0,62</b> | <b>999</b> | <b>67</b> | <b>0,0560</b> | <b>0,0011</b> | <b>0,5183</b> | <b>0,0078</b> | <b>0,0673</b> | <b>0,0010</b> | <b>0,95</b> | <b>0,0197</b> | <b>0,0003</b> | <b>450</b> | <b>41</b> | <b>424,0</b> | <b>5,2</b> | <b>419,7</b> | <b>5,8</b> | <b>393,7</b> | <b>5,6</b> | <b>1,0</b> |
| 17        | 0,39        | 164        | 10        | 0,0536        | 0,0011        | 0,4523        | 0,0080        | 0,0613        | 0,0009        | 0,83        | 0,0196        | 0,0003        | 355        | 47        | 378,9        | 5,6        | 383,3        | 5,4        | 391,5        | 6,6        | -1,1       |
| 18        | 0,28        | 391        | 24        | 0,0536        | 0,0011        | 0,4550        | 0,0074        | 0,0617        | 0,0009        | 0,88        | 0,0184        | 0,0003        | 353        | 44        | 380,8        | 5,2        | 385,8        | 5,4        | 367,5        | 6,0        | -1,3       |
| 19        | 0,06        | 295        | 18        | 0,0543        | 0,0011        | 0,4576        | 0,0075        | 0,0612        | 0,0009        | 0,88        | 0,0203        | 0,0005        | 385        | 44        | 382,6        | 5,2        | 382,8        | 5,4        | 407,0        | 9,1        | -0,1       |
| 20        | 0,12        | 505        | 30        | 0,0548        | 0,0011        | 0,4533        | 0,0072        | 0,0601        | 0,0009        | 0,90        | 0,0189        | 0,0003        | 404        | 43        | 379,6        | 5,0        | 376,2        | 5,3        | 377,6        | 6,8        | 0,9        |
| 21        | 0,34        | 423        | 26        | 0,0547        | 0,0011        | 0,4612        | 0,0074        | 0,0613        | 0,0009        | 0,90        | 0,0187        | 0,0003        | 398        | 43        | 385,1        | 5,1        | 383,5        | 5,4        | 374,6        | 5,9        | 0,4        |
| 22        | 0,34        | 208        | 12        | 0,0548        | 0,0011        | 0,4519        | 0,0078        | 0,0600        | 0,0009        | 0,84        | 0,0193        | 0,0003        | 402        | 45        | 378,6        | 5,4        | 375,3        | 5,3        | 386,3        | 6,6        | 0,9        |
| 23        | 0,23        | 427        | 26        | 0,0545        | 0,0011        | 0,4591        | 0,0074        | 0,0612        | 0,0009        | 0,89        | 0,0185        | 0,0003        | 390        | 43        | 383,7        | 5,2        | 383,1        | 5,3        | 370,3        | 6,2        | 0,2        |
| 24        | 0,21        | 315        | 19        | 0,0546        | 0,0011        | 0,4518        | 0,0075        | 0,0602        | 0,0009        | 0,88        | 0,0185        | 0,0003        | 394        | 44        | 378,6        | 5,2        | 376,6        | 5,3        | 370,2        | 6,5        | 0,5        |
| 25        | 0,47        | 159        | 9,6       | 0,0550        | 0,0012        | 0,4578        | 0,0084        | 0,0604        | 0,0009        | 0,79        | 0,0188        | 0,0003        | 413        | 47        | 382,7        | 5,8        | 378,2        | 5,4        | 377,0        | 6,7        | 1,2        |
| 26        | 0,10        | 331        | 20        | 0,0552        | 0,0011        | 0,4593        | 0,0076        | 0,0604        | 0,0009        | 0,87        | 0,0182        | 0,0004        | 420        | 44        | 383,8        | 5,3        | 378,3        | 5,3        | 365,4        | 7,4        | 1,5        |
| 27        | 0,07        | 619        | 38        | 0,0554        | 0,0011        | 0,4629        | 0,0075        | 0,0606        | 0,0009        | 0,89        | 0,0187        | 0,0004        | 430        | 43        | 386,3        | 5,2        | 379,5        | 5,3        | 375,1        | 7,8        | 1,8        |
| 28        | 0,23        | 292        | 18        | 0,0542        | 0,0011        | 0,4583        | 0,0076        | 0,0614        | 0,0009        | 0,87        | 0,0193        | 0,0003        | 379        | 45        | 383,1        | 5,3        | 384,4        | 5,4        | 386,5        | 6,8        | -0,3       |
| 29        | 0,58        | 242        | 15        | 0,0551        | 0,0011        | 0,4562        | 0,0078        | 0,0602        | 0,0009        | 0,85        | 0,0184        | 0,0003        | 415        | 45        | 381,6        | 5,4        | 376,7        | 5,3        | 368,8        | 6,2        | 1,3        |
| 30        | 0,41        | 151        | 9,1       | 0,0549        | 0,0013        | 0,4555        | 0,0089        | 0,0603        | 0,0009        | 0,76        | 0,0197        | 0,0004        | 408        | 50        | 381,1        | 6,2        | 377,3        | 5,4        | 394,6        | 7,6        | 1,0        |
| <b>31</b> | <b>0,15</b> | <b>274</b> | <b>17</b> | <b>0,0553</b> | <b>0,0011</b> | <b>0,4804</b> | <b>0,0081</b> | <b>0,0632</b> | <b>0,0009</b> | <b>0,85</b> | <b>0,0195</b> | <b>0,0004</b> | <b>422</b> | <b>44</b> | <b>398,3</b> | <b>5,6</b> | <b>394,8</b> | <b>5,5</b> | <b>391,2</b> | <b>7,7</b> | <b>0,9</b> |
| 32        | 0,16        | 223        | 14        | 0,0554        | 0,0012        | 0,4639        | 0,0083        | 0,0608        | 0,0009        | 0,81        | 0,0194        | 0,0004        | 430        | 46        | 387,0        | 5,8        | 380,4        | 5,4        | 388,1        | 8,2        | 1,7        |
| 33        | 0,20        | 148        | 9,0       | 0,0547        | 0,0012        | 0,4577        | 0,0086        | 0,0608        | 0,0009        | 0,78        | 0,0189        | 0,0004        | 401        | 49        | 382,7        | 6,0        | 380,2        | 5,4        | 379,2        | 8,3        | 0,7        |

21-19/2, muscovite leucogranite of Aba massif, late phase

| № | Th/U | U<br>ppm | <sup>206</sup> Pb<br>ppm | Isotopic ratios                      |        |                                     |        |                                     |        |      |                                      | ages   |                                      |    |                                     |     |                                     |     |                                      | D,<br>% |     |
|---|------|----------|--------------------------|--------------------------------------|--------|-------------------------------------|--------|-------------------------------------|--------|------|--------------------------------------|--------|--------------------------------------|----|-------------------------------------|-----|-------------------------------------|-----|--------------------------------------|---------|-----|
|   |      |          |                          | <sup>207</sup> Pb/ <sup>206</sup> Pb | 1σ     | <sup>207</sup> Pb/ <sup>235</sup> U | 1σ     | <sup>206</sup> Pb/ <sup>238</sup> U | 1σ     | Rho  | <sup>208</sup> Pb/ <sup>232</sup> Th | 1σ     | <sup>207</sup> Pb/ <sup>206</sup> Pb | 1σ | <sup>207</sup> Pb/ <sup>235</sup> U | 1σ  | <sup>206</sup> Pb/ <sup>238</sup> U | 1σ  | <sup>208</sup> Pb/ <sup>232</sup> Th |         | 1σ  |
| 1 | 0,08 | 533      | 33                       | 0,0547                               | 0,0011 | 0,4604                              | 0,0074 | 0,0611                              | 0,0009 | 0,88 | 0,0196                               | 0,0004 | 400                                  | 44 | 384,6                               | 5,2 | 382,4                               | 5,3 | 392,7                                | 8,2     | 0,6 |
| 2 | 0,35 | 282      | 17                       | 0,0547                               | 0,0012 | 0,4586                              | 0,0081 | 0,0609                              | 0,0009 | 0,82 | 0,0186                               | 0,0003 | 400                                  | 46 | 383,3                               | 5,7 | 381,1                               | 5,3 | 372,3                                | 6,7     | 0,6 |

|    |             |            |           |               |               |               |               |               |               |             |               |               |            |           |              |            |              |            |              |            |             |
|----|-------------|------------|-----------|---------------|---------------|---------------|---------------|---------------|---------------|-------------|---------------|---------------|------------|-----------|--------------|------------|--------------|------------|--------------|------------|-------------|
| 3  | 0,26        | 143        | 8,8       | 0,0541        | 0,0012        | 0,4553        | 0,0090        | 0,0612        | 0,0009        | 0,74        | 0,0179        | 0,0004        | 374        | 51        | 381,0        | 6,3        | 382,6        | 5,4        | 357,9        | 7,8        | -0,4        |
| 4  | 0,06        | 523        | 32        | 0,0548        | 0,0012        | 0,4621        | 0,0082        | 0,0613        | 0,0009        | 0,81        | 0,0176        | 0,0006        | 404        | 46        | 385,7        | 5,7        | 383,3        | 5,4        | 352,0        | 10,8       | 0,6         |
| 5  | 0,08        | 880        | 54        | 0,0541        | 0,0010        | 0,4572        | 0,0071        | 0,0614        | 0,0009        | 0,92        | 0,0199        | 0,0004        | 375        | 43        | 382,3        | 4,9        | 384,1        | 5,3        | 398,0        | 7,3        | -0,5        |
| 6  | 0,33        | 133        | 8,2       | 0,0546        | 0,0013        | 0,4647        | 0,0094        | 0,0618        | 0,0009        | 0,73        | 0,0182        | 0,0004        | 395        | 52        | 387,5        | 6,5        | 386,8        | 5,5        | 364,0        | 7,7        | 0,2         |
| 7  | <b>0,12</b> | <b>344</b> | <b>22</b> | <b>0,0553</b> | <b>0,0011</b> | <b>0,4751</b> | <b>0,0080</b> | <b>0,0625</b> | <b>0,0009</b> | <b>0,84</b> | <b>0,0184</b> | <b>0,0004</b> | <b>423</b> | <b>45</b> | <b>394,7</b> | <b>5,5</b> | <b>390,5</b> | <b>5,4</b> | <b>369,3</b> | <b>7,9</b> | <b>1,1</b>  |
| 8  | 0,10        | 952        | 58        | 0,0547        | 0,0011        | 0,4614        | 0,0071        | 0,0613        | 0,0009        | 0,92        | 0,0199        | 0,0004        | 400        | 42        | 385,3        | 4,9        | 383,3        | 5,3        | 398,6        | 6,9        | 0,5         |
| 9  | <b>0,43</b> | <b>167</b> | <b>13</b> | <b>0,0569</b> | <b>0,0012</b> | <b>0,6019</b> | <b>0,0110</b> | <b>0,0769</b> | <b>0,0011</b> | <b>0,79</b> | <b>0,0230</b> | <b>0,0004</b> | <b>486</b> | <b>47</b> | <b>478,5</b> | <b>7,0</b> | <b>477,5</b> | <b>6,7</b> | <b>460,0</b> | <b>8,3</b> | <b>0,2</b>  |
| 10 | 0,41        | 193        | 12        | 0,0551        | 0,0013        | 0,4595        | 0,0089        | 0,0606        | 0,0009        | 0,75        | 0,0184        | 0,0004        | 415        | 49        | 383,9        | 6,2        | 379,3        | 5,4        | 368,9        | 7,0        | 1,2         |
| 11 | 0,04        | 737        | 45        | 0,0542        | 0,0011        | 0,4544        | 0,0071        | 0,0609        | 0,0009        | 0,90        | 0,0184        | 0,0004        | 381        | 43        | 380,4        | 5,0        | 380,9        | 5,3        | 368,0        | 8,6        | -0,1        |
| 12 | 0,12        | 429        | 26        | 0,0544        | 0,0011        | 0,4534        | 0,0075        | 0,0605        | 0,0009        | 0,86        | 0,0185        | 0,0004        | 389        | 45        | 379,6        | 5,3        | 378,7        | 5,3        | 370,6        | 7,6        | 0,2         |
| 13 | 0,06        | 923        | 57        | 0,0536        | 0,0010        | 0,4539        | 0,0071        | 0,0615        | 0,0009        | 0,91        | 0,0193        | 0,0004        | 355        | 43        | 380,0        | 4,9        | 384,7        | 5,3        | 386,4        | 7,7        | -1,2        |
| 14 | <b>0,07</b> | <b>678</b> | <b>43</b> | <b>0,0544</b> | <b>0,0011</b> | <b>0,4785</b> | <b>0,0075</b> | <b>0,0639</b> | <b>0,0009</b> | <b>0,91</b> | <b>0,0199</b> | <b>0,0004</b> | <b>389</b> | <b>43</b> | <b>397,0</b> | <b>5,1</b> | <b>399,0</b> | <b>5,5</b> | <b>399,1</b> | <b>7,8</b> | <b>-0,5</b> |
| 15 | 0,07        | 725        | 45        | 0,0539        | 0,0011        | 0,4560        | 0,0072        | 0,0615        | 0,0009        | 0,90        | 0,0190        | 0,0004        | 365        | 43        | 381,5        | 5,0        | 384,8        | 5,3        | 380,4        | 7,5        | -0,9        |
| 16 | 0,13        | 230        | 14        | 0,0541        | 0,0011        | 0,4544        | 0,0080        | 0,0611        | 0,0009        | 0,82        | 0,0186        | 0,0004        | 374        | 47        | 380,4        | 5,6        | 382,0        | 5,3        | 373,2        | 8,3        | -0,4        |
| 17 | 0,11        | 892        | 54        | 0,0541        | 0,0011        | 0,4540        | 0,0071        | 0,0610        | 0,0009        | 0,90        | 0,0101        | 0,0002        | 375        | 43        | 380,1        | 5,0        | 381,4        | 5,3        | 202,3        | 4,1        | -0,3        |
| 18 | 0,07        | 886        | 54        | 0,0540        | 0,0010        | 0,4523        | 0,0070        | 0,0608        | 0,0009        | 0,91        | 0,0205        | 0,0004        | 372        | 43        | 378,9        | 4,9        | 380,6        | 5,2        | 410,4        | 7,6        | -0,4        |
| 19 | 0,34        | 147        | 8,8       | 0,0545        | 0,0013        | 0,4503        | 0,0091        | 0,0601        | 0,0009        | 0,72        | 0,0182        | 0,0004        | 390        | 52        | 377,5        | 6,4        | 376,0        | 5,4        | 365,4        | 7,7        | 0,4         |
| 20 | 0,38        | 168        | 10        | 0,0544        | 0,0013        | 0,4564        | 0,0091        | 0,0610        | 0,0009        | 0,73        | 0,0186        | 0,0004        | 387        | 51        | 381,8        | 6,4        | 381,4        | 5,4        | 373,1        | 7,5        | 0,1         |
| 21 | 0,04        | 1650       | 101       | 0,0535        | 0,0010        | 0,4504        | 0,0068        | 0,0611        | 0,0009        | 0,93        | 0,0189        | 0,0004        | 352        | 42        | 377,6        | 4,8        | 382,4        | 5,3        | 379,0        | 6,9        | -1,3        |
| 22 | 0,80        | 1249       | 76        | 0,0546        | 0,0010        | 0,4564        | 0,0070        | 0,0607        | 0,0009        | 0,93        | 0,0187        | 0,0003        | 396        | 42        | 381,7        | 4,9        | 379,9        | 5,2        | 374,8        | 5,6        | 0,5         |
| 23 | <b>0,19</b> | <b>631</b> | <b>40</b> | <b>0,0547</b> | <b>0,0011</b> | <b>0,4810</b> | <b>0,0075</b> | <b>0,0639</b> | <b>0,0009</b> | <b>0,91</b> | <b>0,0200</b> | <b>0,0003</b> | <b>400</b> | <b>43</b> | <b>398,8</b> | <b>5,2</b> | <b>399,0</b> | <b>5,5</b> | <b>400,2</b> | <b>6,7</b> | <b>-0,1</b> |
| 24 | 0,38        | 124        | 7,6       | 0,0544        | 0,0014        | 0,4547        | 0,0103        | 0,0607        | 0,0009        | 0,66        | 0,0193        | 0,0004        | 389        | 57        | 380,6        | 7,2        | 379,7        | 5,5        | 386,0        | 8,7        | 0,2         |
| 25 | 0,40        | 111        | 6,7       | 0,0550        | 0,0013        | 0,4542        | 0,0091        | 0,0600        | 0,0009        | 0,73        | 0,0188        | 0,0004        | 410        | 51        | 380,2        | 6,4        | 375,9        | 5,4        | 375,4        | 7,4        | 1,1         |
| 26 | 0,04        | 408        | 25        | 0,0547        | 0,0011        | 0,4578        | 0,0076        | 0,0607        | 0,0009        | 0,86        | 0,0199        | 0,0005        | 402        | 44        | 382,7        | 5,3        | 380,2        | 5,3        | 398,4        | 10,8       | 0,7         |
| 27 | 0,04        | 1543       | 94        | 0,0541        | 0,0010        | 0,4521        | 0,0069        | 0,0607        | 0,0009        | 0,93        | 0,0184        | 0,0004        | 376        | 42        | 378,7        | 4,8        | 379,7        | 5,2        | 369,0        | 6,9        | -0,3        |
| 28 | 0,11        | 223        | 14        | 0,0547        | 0,0012        | 0,4603        | 0,0082        | 0,0611        | 0,0009        | 0,81        | 0,0188        | 0,0005        | 400        | 46        | 384,5        | 5,7        | 382,5        | 5,4        | 376,5        | 9,1        | 0,5         |
| 29 | 0,11        | 336        | 20        | 0,0548        | 0,0011        | 0,4580        | 0,0077        | 0,0607        | 0,0009        | 0,86        | 0,0195        | 0,0004        | 403        | 45        | 382,9        | 5,3        | 380,1        | 5,3        | 390,6        | 8,2        | 0,7         |

|    |             |            |            |               |               |               |               |               |               |             |               |               |            |           |              |            |              |            |              |            |             |
|----|-------------|------------|------------|---------------|---------------|---------------|---------------|---------------|---------------|-------------|---------------|---------------|------------|-----------|--------------|------------|--------------|------------|--------------|------------|-------------|
| 30 | 0,24        | 88         | 5,4        | 0,0540        | 0,0013        | 0,4570        | 0,0098        | 0,0615        | 0,0009        | 0,69        | 0,0189        | 0,0005        | 370        | 55        | 382,1        | 6,8        | 384,7        | 5,5        | 378,1        | 9,5        | -0,7        |
| 31 | 0,13        | 231        | 14         | 0,0546        | 0,0012        | 0,4606        | 0,0081        | 0,0613        | 0,0009        | 0,81        | 0,0185        | 0,0004        | 395        | 46        | 384,7        | 5,6        | 383,6        | 5,4        | 369,9        | 8,3        | 0,3         |
| 32 | 0,16        | 407        | 25         | 0,0548        | 0,0011        | 0,4591        | 0,0077        | 0,0609        | 0,0009        | 0,85        | 0,0186        | 0,0004        | 402        | 45        | 383,6        | 5,4        | 381,2        | 5,3        | 373,3        | 7,3        | 0,6         |
| 33 | 0,11        | 159        | 9,7        | 0,0540        | 0,0012        | 0,4528        | 0,0089        | 0,0609        | 0,0009        | 0,74        | 0,0183        | 0,0005        | 372        | 51        | 379,2        | 6,2        | 380,9        | 5,4        | 366,7        | 10,6       | -0,4        |
| 34 | 0,06        | 653        | 40         | 0,0545        | 0,0011        | 0,4586        | 0,0073        | 0,0612        | 0,0009        | 0,90        | 0,0202        | 0,0004        | 390        | 43        | 383,3        | 5,1        | 382,7        | 5,3        | 404,3        | 8,2        | 0,2         |
| 35 | 0,07        | 561        | 34         | 0,0549        | 0,0011        | 0,4550        | 0,0073        | 0,0602        | 0,0009        | 0,89        | 0,0186        | 0,0004        | 407        | 43        | 380,8        | 5,1        | 377,1        | 5,2        | 373,1        | 7,5        | 1,0         |
| 36 | 0,07        | 468        | 28         | 0,0540        | 0,0011        | 0,4516        | 0,0074        | 0,0607        | 0,0009        | 0,87        | 0,0183        | 0,0004        | 372        | 45        | 378,4        | 5,2        | 380,0        | 5,3        | 367,2        | 8,1        | -0,4        |
| 37 | 0,09        | 766        | 46         | 0,0545        | 0,0011        | 0,4526        | 0,0071        | 0,0603        | 0,0009        | 0,90        | 0,0192        | 0,0004        | 391        | 43        | 379,1        | 5,0        | 377,7        | 5,2        | 383,8        | 7,0        | 0,4         |
| 38 | 0,35        | 106        | 6,4        | 0,0539        | 0,0012        | 0,4512        | 0,0089        | 0,0608        | 0,0009        | 0,74        | 0,0188        | 0,0004        | 368        | 51        | 378,1        | 6,2        | 380,3        | 5,4        | 376,2        | 7,8        | -0,6        |
| 39 | <b>0,22</b> | <b>310</b> | <b>20</b>  | <b>0,0547</b> | <b>0,0011</b> | <b>0,4768</b> | <b>0,0080</b> | <b>0,0633</b> | <b>0,0009</b> | <b>0,86</b> | <b>0,0201</b> | <b>0,0004</b> | <b>399</b> | <b>45</b> | <b>395,8</b> | <b>5,5</b> | <b>395,9</b> | <b>5,5</b> | <b>401,7</b> | <b>7,4</b> | <b>0,0</b>  |
| 40 | <b>0,31</b> | <b>115</b> | <b>7,3</b> | <b>0,0544</b> | <b>0,0012</b> | <b>0,4764</b> | <b>0,0092</b> | <b>0,0636</b> | <b>0,0009</b> | <b>0,76</b> | <b>0,0191</b> | <b>0,0004</b> | <b>387</b> | <b>50</b> | <b>395,6</b> | <b>6,3</b> | <b>397,7</b> | <b>5,6</b> | <b>381,9</b> | <b>8,0</b> | <b>-0,5</b> |

Notes: Bold italics are analytical data not included in the calculation of the weighted average  $^{206}\text{Pb}/^{238}\text{U}$  age.
